# Supplementary material
Source: PubMed Central journal article supplement (PMC2668245)
Supplement: NIHMS97939-supplement-Table_S1.pdf [file NIHMS97939-supplement-Table_S1.pdf]

**Table S1.** A summary of proteins identified by nanoLC/MS/MS in Con A lectin-selected urine samples. Protein ids were obtained from at least two analyses. *N*-linked or *O*-linked glycoproteins as annotated in Swiss-Prot database; predicted, potential or no sites as determined by NetNGlyc 1.0 server.

| Swiss-Prot ID | Protein Name                      | Subcellular location | Glycoprotein | T3 | T4 | T9 | T8 | T13 | N3 | N10 | N2 | N5 | N7 |
|---------------|-----------------------------------|----------------------|--------------|----|----|----|----|-----|----|-----|----|----|----|
| A1AG1_HUMAN   | Alpha-1-acid glycoprotein 1       | secreted protein     | n-linked     |    |    | 1  | 1  | 1   |    | 1   | 1  |    |    |
| A1AG2_HUMAN   | Alpha-1-acid glycoprotein 2       | secreted protein     | n-linked     |    |    |    |    | 1   |    |     | 1  |    |    |
| A1AT_HUMAN    | Alpha-1-antitrypsin               | secreted protein     | n-linked     | 1  | 1  | 1  |    | 1   |    |     | 1  |    | 1  |
| A1BG_HUMAN    | Alpha-1B-glycoprotein             | secreted protein     | n-linked     | 1  | 1  | 1  | 1  | 1   |    |     |    |    |    |
| A2AP_HUMAN    | Alpha-2-antiplasmin               | secreted protein     | n-linked     |    |    | 1  |    |     |    |     |    |    |    |
| A2GL_HUMAN    | Leucine-rich alpha-2-glycoprotein | secreted protein     | o-, n-linked |    |    |    |    | 1   |    |     | 1  |    |    |
| A2MG_HUMAN    | Alpha-2-macroglobulin             | extracellular        | n-linked     | 1  |    | 1  |    |     |    |     | 1  |    |    |
| AACT_HUMAN    | Alpha-1-antichymotrypsin          | secreted protein     | n-linked     | 1  | 1  | 1  |    |     |    |     | 1  |    |    |
| ACTA_HUMAN    | Actin, aortic smooth muscle       | cytoplasm            | potential    |    |    |    |    | 1   |    |     | 1  |    |    |
| AFAM_HUMAN    | Afamin                            | secreted protein     | n-linked     | 1  |    | 1  |    |     |    |     | 1  |    |    |
| ALBU_HUMAN    | Serum albumin                     | secreted protein     | n-linked     | 1  |    | 1  | 1  | 1   | 1  | 1   | 1  | 1  | 1  |
| AMBP_HUMAN    | AMBP protein                      | secreted protein     | o-, n-linked | 1  | 1  | 1  | 1  | 1   | 1  | 1   | 1  | 1  | 1  |
| AMPN_HUMAN    | Aminopeptidase N                  | membrane             | n-linked     |    |    |    | 1  |     |    |     |    |    |    |
| ANAG_HUMAN    | Alpha-N-acetylglucosaminidase     | lysosome             | n-linked     |    | 1  |    |    |     | 1  |     |    |    |    |
| ANT3_HUMAN    | Antithrombin-III                  | secreted protein     | n-linked     |    |    |    |    |     |    |     | 1  |    |    |
| ANXA1_HUMAN   | Annexin A1                        | cytoplasm            | potential    |    | 1  |    |    |     |    |     |    |    |    |
| AMYC_HUMAN    | Alpha-amylase 2B                  | secreted protein     | predicted    |    |    |    |    |     |    |     |    | 1  | 1  |
| AMYP_HUMAN    | Pancreatic alpha-amylase          | secreted protein     | n-linked     |    |    |    |    |     |    |     |    |    | 1  |
| APOA_HUMAN    | Apolipoprotein(a)                 | extracellular        | o-, n-linked | 1  | 1  |    | 1  | 1   |    | 1   | 1  | 1  |    |
| APOA1_HUMAN   | Apolipoprotein A-I                | secreted protein     | no sites     |    |    | 1  |    |     |    |     | 1  |    |    |
| APOA2_HUMAN   | Apolipoprotein A-II               | secreted protein     | no sites     |    |    | 1  |    |     |    |     | 1  |    |    |
| APOA4_HUMAN   | Apolipoprotein A-IV               | secreted protein     | no sites     |    |    | 1  |    |     |    |     |    |    |    |
| APOC3_HUMAN   | Apolipoprotein C-III              | secreted protein     | o-linked     |    |    | 1  |    |     |    |     |    |    |    |
| APOD_HUMAN    | Apolipoprotein D                  | secreted protein     | n-linked     |    |    |    | 1  | 1   |    | 1   |    | 1  | 1  |
| APOH_HUMAN    | Beta-2-glycoprotein 1             | secreted protein     | o-, n-linked | 1  |    | 1  |    |     | 1  | 1   | 1  |    |    |
| ARSA_HUMAN    | Arylsulfatase A                   | lysosome             | n-linked     | 1  | 1  |    | 1  |     | 1  | 1   |    | 1  | 1  |
| ARSB_HUMAN    | Arylsulfatase B                   | lysosome             | n-linked     |    |    |    |    |     | 1  |     |    |    |    |
| ASAHI_HUMAN   | Acid ceramidase                   | lysosome             | n-linked     |    |    |    |    |     |    | 1   |    |    |    |

| ATM_HUMAN            | Serine-protein kinase ATM             | nucleus                     | potential           |           |           |           |           |            |           |            | 1         |           |           | 1 |
|----------------------|---------------------------------------|-----------------------------|---------------------|-----------|-----------|-----------|-----------|------------|-----------|------------|-----------|-----------|-----------|---|
| <b>Swiss-Prot ID</b> | <b>Protein Name</b>                   | <b>Subcellular location</b> | <b>Glycoprotein</b> | <b>T3</b> | <b>T4</b> | <b>T9</b> | <b>T8</b> | <b>T13</b> | <b>N3</b> | <b>N10</b> | <b>N2</b> | <b>N5</b> | <b>N7</b> |   |
| ATRN_HUMAN           | Attractin                             | secreted protein            | n-linked            |           | 1         |           |           |            | 1         | 1          |           | 1         | 1         |   |
| B2MG_HUMAN           | Beta-2-microglobulin                  | secreted protein            | no sites            |           |           |           |           | 1          |           |            | 1         |           | 1         |   |
| BASP_HUMAN           | BASP1 protein                         | membrane                    | no sites            |           |           |           |           | 1          |           |            |           |           |           |   |
| BGAL_HUMAN           | Beta-galactosidase                    | lysosome                    | n-linked            |           | 1         |           | 1         |            | 1         | 1          |           |           | 1         |   |
| BGLR_HUMAN           | Beta-glucuronidase                    | lysosome                    | n-linked            |           |           |           | 1         |            | 1         | 1          |           |           | 1         |   |
| C4BP_HUMAN           | C4b-binding protein alpha chain       | extracellular               | n-linked            |           | 1         | 1         |           |            |           |            |           |           |           |   |
| CAD11_HUMAN          | Cadherin-11                           | membrane                    | n-linked            |           |           |           | 1         |            | 1         | 1          |           |           |           |   |
| CAD13_HUMAN          | Cadherin-13                           | membrane                    | n-linked            |           | 1         |           | 1         | 1          |           |            |           | 1         |           |   |
| CADH1_HUMAN          | Epithelial-cadherin                   | membrane                    | n-linked            | 1         | 1         |           | 1         | 1          | 1         | 1          | 1         |           |           |   |
| CADH2_HUMAN          | Cadherin-2                            | membrane                    | n-linked            | 1         | 1         |           | 1         |            | 1         | 1          |           | 1         |           |   |
| CATC_HUMAN           | Cathepsin C                           | lysosome                    | n-linked            |           |           |           | 1         |            |           |            |           |           |           |   |
| CATD_HUMAN           | Cathepsin D                           | lysosome                    | n-linked            | 1         | 1         |           | 1         |            |           | 1          |           |           | 1         |   |
| CATL_HUMAN           | Cathepsin L                           | lysosome                    | n-linked            |           |           |           |           |            |           |            |           |           | 1         |   |
| CATZ_HUMAN           | Cathepsin Z                           | lysosome                    | n-linked            |           | 1         |           | 1         |            |           | 1          |           |           |           |   |
| CD14_HUMAN           | Monocyte differentiation antigen CD14 | membrane                    | n-linked            |           |           |           | 1         |            |           | 1          |           |           |           |   |
| CD44_HUMAN           | CD44 antigen                          | membrane                    | n-linked            | 1         | 1         |           | 1         | 1          | 1         | 1          |           | 1         | 1         |   |
| CD59_HUMAN           | CD59 glycoprotein                     | membrane                    | o-, n-linked        | 1         | 1         |           | 1         | 1          | 1         | 1          | 1         | 1         | 1         |   |
| CERU_HUMAN           | Ceruloplasmin                         | secreted protein            | n-linked            | 1         | 1         | 1         |           |            |           |            |           |           |           |   |
| CFAH_HUMAN           | Complement factor H                   | secreted protein            | n-linked            |           | 1         | 1         |           |            |           |            |           |           |           |   |
| CHD6_HUMAN           | CHD-6                                 | nucleus                     | potential           |           |           |           |           |            | 1         |            |           |           |           |   |
| CING_HUMAN           | Cingulin                              | cytoplasm                   | potential           |           | 1         | 1         |           |            |           |            |           |           |           |   |
| CLUS_HUMAN           | Clusterin                             | secreted protein            | n-linked            | 1         |           | 1         | 1         | 1          |           |            |           | 1         | 1         |   |
| CO3_HUMAN            | Complement C3                         | secreted protein            | n-linked            | 1         |           | 1         |           |            |           |            | 1         |           |           |   |
| CO4_HUMAN            | Complement C4-B                       | secreted protein            | n-linked            |           | 1         | 1         |           |            |           |            |           |           |           |   |
| CO6A1_HUMAN          | Collagen alpha-1(VI) chain            | extracellular               | n-linked            | 1         |           |           |           |            |           |            |           |           | 1         |   |
| COCH_HUMAN           | Cochlin                               | secreted protein            | n-linked            |           |           |           |           |            |           |            |           | 1         |           |   |
| COFA1_HUMAN          | Collagen alpha-1(XV) chain            | extracellular               | n-linked            |           |           |           |           |            |           |            |           |           | 1         |   |
| CYTC_HUMAN           | Cystatin C                            | unknown                     | no sites            |           |           |           |           |            |           |            |           |           | 1         |   |
| DERM_HUMAN           | Dermatopontin                         | secreted protein            | no sites            |           |           |           | 1         |            |           |            |           | 1         |           |   |
| DDEF2_HUMAN          | PAP                                   | cytoplasm                   | potential           |           |           |           |           |            | 1         |            |           |           |           |   |
| DIAC_HUMAN           | Di-N-acetylchitobiase                 | lysosome                    | n-linked            |           |           |           | 1         |            |           |            |           |           |           |   |

| DNAS1_HUMAN          | Deoxyribonuclease-1                      | secreted protein            | n-linked            |           |           |           |           |            |           |            | 1         |           |           | 1 |
|----------------------|------------------------------------------|-----------------------------|---------------------|-----------|-----------|-----------|-----------|------------|-----------|------------|-----------|-----------|-----------|---|
| <b>Swiss-Prot ID</b> | <b>Protein Name</b>                      | <b>Subcellular location</b> | <b>Glycoprotein</b> | <b>T3</b> | <b>T4</b> | <b>T9</b> | <b>T8</b> | <b>T13</b> | <b>N3</b> | <b>N10</b> | <b>N2</b> | <b>N5</b> | <b>N7</b> |   |
| DPP4_HUMAN           | Dipeptidyl peptidase 4                   | secreted protein            | n-linked            |           |           |           |           |            | 1         |            |           |           |           |   |
| DSC2_HUMAN           | Desmocollin-2                            | membrane                    | n-linked            |           | 1         |           |           |            |           |            |           |           |           |   |
| DYN2_HUMAN           | Dynamin-2                                | cytoplasm                   | potential           |           | 1         |           |           |            | 1         |            |           |           |           |   |
| EGF_HUMAN            | Pro-epidermal growth factor              | membrane                    | n-linked            | 1         | 1         |           |           |            |           |            |           | 1         | 1         |   |
| ELNE_HUMAN           | Leukocyte elastase                       | extracellular               | n-linked            |           |           |           |           |            |           |            | 1         |           |           |   |
| FBN1_HUMAN           | Fibrillin-1                              | extracellular               | n-linked            |           |           |           | 1         | 1          |           |            |           | 1         | 1         |   |
| FCG3A_HUMAN          | IgG Fc receptor III-2                    | secreted protein            | n-linked            |           | 1         |           |           |            |           |            |           |           |           |   |
| FCG3B_HUMAN          | IgG Fc receptor III-1                    | secreted protein            | n-linked            |           | 1         |           |           |            |           |            |           |           |           |   |
| FETUA_HUMAN          | Alpha-2-HS-glycoprotein                  | secreted protein            | o-, n-linked        |           | 1         | 1         | 1         |            |           |            |           |           |           |   |
| FIBA_HUMAN           | Fibrinogen alpha chain                   | secreted protein            | n-linked            | 1         |           | 1         |           |            |           |            | 1         |           |           |   |
| FIBB_HUMAN           | Fibrinogen beta chain                    | secreted protein            | n-linked            | 1         | 1         | 1         |           |            |           |            | 1         |           |           |   |
| FIBG_HUMAN           | Fibrinogen gamma chain                   | secreted protein            | n-linked            | 1         |           | 1         |           |            |           |            | 1         |           |           |   |
| FINC_HUMAN           | Fibronectin                              | secreted protein            | o-, n-linked        |           |           | 1         | 1         |            | 1         |            |           |           |           |   |
| GDIS_HUMAN           | Rho GDP-dissociation inhibitor 2         | cytoplasm                   | potential           |           |           |           |           | 1          |           |            |           |           |           |   |
| GELS_HUMAN           | Gelsolin                                 | secreted protein            | no sites            |           |           |           | 1         | 1          |           | 1          | 1         |           | 1         |   |
| GGH_HUMAN            | Gamma-glutamyl hydrolase                 | secreted protein            | n-linked            |           |           |           | 1         |            | 1         | 1          |           |           | 1         |   |
| GILT_HUMAN           | Gamma-interferon-inducible protein IP-30 | lysosome                    | n-linked            |           |           |           | 1         |            |           |            |           |           |           |   |
| GL6S_HUMAN           | N-acetylglucosamine-6-sulfatase          | lysosome                    | n-linked            |           | 1         |           | 1         |            | 1         | 1          |           |           |           |   |
| GP2_HUMAN            | ZAP75                                    | secreted protein            | n-linked            |           | 1         |           |           |            |           |            |           |           |           |   |
| GP73_HUMAN           | Golgi phosphoprotein 2                   | membrane                    | n-linked            |           |           |           |           |            |           |            |           |           | 1         |   |
| HBA_HUMAN            | Hemoglobin subunit alpha                 | -                           | no sites            |           | 1         | 1         |           |            |           |            | 1         |           |           |   |
| HBB_HUMAN            | Hemoglobin subunit beta                  | -                           | n-linked            | 1         | 1         | 1         |           |            |           |            | 1         |           |           |   |
| HBD_HUMAN            | Hemoglobin subunit delta                 | -                           | no sites            |           | 1         | 1         |           |            |           |            |           |           |           |   |
| HEMO_HUMAN           | Hemopexin                                | secreted protein            | o-, n-linked        | 1         |           | 1         |           |            | 1         | 1          | 1         |           |           |   |
| HEXA_HUMAN           | Beta-hexosaminidase alpha chain          | lysosome                    | n-linked            |           |           |           |           |            | 1         |            |           |           |           |   |
| HEXB_HUMAN           | Beta-hexosaminidase beta chain           | lysosome                    | n-linked            |           |           |           | 1         |            | 1         |            |           |           |           |   |
| HPT_HUMAN            | Haptoglobin                              | secreted protein            | n-linked            | 1         | 1         | 1         |           | 1          |           |            | 1         |           |           |   |
| HPTR_HUMAN           | Haptoglobin-related protein              | secreted protein            | predicted           | 1         | 1         | 1         |           |            |           | 1          | 1         |           |           |   |
| HRG_HUMAN            | Histidine-rich glycoprotein              | secreted protein            | n-linked            |           | 1         | 1         |           |            |           |            |           |           |           |   |
| HV1A_HUMAN           | Ig heavy chain V-I region EU             | extracellular               | no sites            | 1         |           | 1         |           |            |           |            |           |           |           |   |
| HV3D_HUMAN           | Ig heavy chain V-III region TIL          | extracellular               | no sites            |           |           | 1         |           |            |           |            |           |           |           |   |



| LRP2_HUMAN<br><b>Swiss-Prot ID</b> | Glycoprotein 330<br><b>Protein Name</b>    | membrane<br><b>Subcellular location</b> | n-linked<br><b>Glycoprotein</b> | 1  | 1  |    |    |     |    |     | 1  |    |    |  |
|------------------------------------|--------------------------------------------|-----------------------------------------|---------------------------------|----|----|----|----|-----|----|-----|----|----|----|--|
|                                    |                                            |                                         |                                 | T3 | T4 | T9 | T8 | T13 | N3 | N10 | N2 | N5 | N7 |  |
| LSAMP_HUMAN                        | Limbic system-associated membrane protein  | membrane                                | n-linked                        |    |    |    |    |     |    | 1   |    |    |    |  |
| LU_HUMAN                           | Lutheran blood group glycoprotein          | membrane                                | n-linked                        |    |    |    |    |     |    |     |    |    | 1  |  |
| LUM_HUMAN                          | Lumican                                    | secreted protein                        | n-linked                        |    | 1  |    |    |     |    |     |    |    |    |  |
| LV3A_HUMAN                         | Ig lambda chain V-III region SH            | extracellular                           | no sites                        |    | 1  | 1  |    |     |    |     |    |    |    |  |
| LYAG_HUMAN                         | Lysosomal alpha-glucosidase                | lysosome                                | n-linked                        | 1  |    |    | 1  | 1   | 1  | 1   |    | 1  | 1  |  |
| MA2B2_HUMAN                        | Epididymis-specific alpha-mannosidase      | secreted protein                        | n-linked                        |    |    |    |    |     | 1  |     |    |    |    |  |
| MASP2_HUMAN                        | MASP-2                                     | secreted protein                        | no sites                        |    |    |    |    |     |    |     |    | 1  |    |  |
| MGA_HUMAN                          | Maltase-glucoamylase, intestinal           | membrane                                | n-linked                        |    | 1  |    | 1  |     | 1  |     |    |    |    |  |
| MMP9_HUMAN                         | Matrix metalloproteinase-9                 | extracellular                           | n-linked                        |    |    |    |    |     |    |     | 1  |    |    |  |
| MUC18_HUMAN                        | Cell surface glycoprotein MUC18            | membrane                                | n-linked                        |    | 1  |    |    |     |    |     |    |    |    |  |
| MUCDL_HUMAN                        | Mucin and cadherin-like protein            | membrane                                | o-, n-linked                    |    | 1  |    |    |     |    |     |    |    |    |  |
| NAGAB_HUMAN                        | Alpha-galactosidase B                      | lysosome                                | n-linked                        |    |    |    | 1  |     |    |     |    |    | 1  |  |
| NARG1_HUMAN                        | NMDA receptor-regulated protein 1          | cytoplasm                               | potential                       |    |    |    |    |     | 1  |     |    |    |    |  |
| NCOR1_HUMAN                        | Nuclear receptor corepressor 1             | nucleus                                 | potential                       |    |    |    | 1  | 1   |    |     |    |    |    |  |
| NEGR1_HUMAN                        | Neuronal growth regulator 1                | membrane                                | n-linked                        |    | 1  |    |    |     |    |     |    | 1  |    |  |
| NGAL_HUMAN                         | Neutrophil gelatinase-associated lipocalin | secreted protein                        | n-linked                        |    |    |    |    |     |    |     | 1  |    |    |  |
| NIDO_HUMAN                         | Nidogen-1                                  | secreted protein                        | n-linked                        |    |    |    |    |     |    | 1   |    |    | 1  |  |
| NTRI_HUMAN                         | Neurotrimin                                | membrane                                | n-linked                        |    |    |    |    |     | 1  |     |    |    |    |  |
| ORN_HUMAN                          | Oligoribonuclease, mitochondrial           | nucleus                                 | no sites                        |    |    |    |    |     |    |     | 1  |    |    |  |
| OSTP_HUMAN                         | Osteopontin                                | secreted protein                        | o-, n-linked                    | 1  | 1  |    | 1  |     |    | 1   |    |    | 1  |  |
| PCDH1_HUMAN                        | Protocadherin-1                            | membrane                                | n-linked                        |    | 1  |    |    |     |    |     |    |    |    |  |
| PCP_HUMAN                          | Lysosomal Pro-X carboxypeptidase           | lysosome                                | n-linked                        |    |    |    |    |     | 1  |     |    |    |    |  |
| PEPA_HUMAN                         | Pepsin A                                   | secreted protein                        | no sites                        |    |    |    | 1  |     |    |     |    |    |    |  |
| PERM_HUMAN                         | Myeloperoxidase                            | lysosome                                | n-linked                        |    |    |    |    |     |    |     | 1  |    |    |  |
| PGBM_HUMAN                         | HSPG                                       | secreted protein                        | o-, n-linked                    |    | 1  |    | 1  | 1   |    | 1   |    | 1  | 1  |  |
| PIGR_HUMAN                         | Polymeric-immunoglobulin receptor          | secreted protein                        | n-linked                        | 1  | 1  |    | 1  | 1   | 1  | 1   |    | 1  | 1  |  |
| PPAL_HUMAN                         | Lysosomal acid phosphatase                 | lysosome                                | n-linked                        |    |    |    | 1  |     | 1  | 1   |    |    | 1  |  |
| PPGB_HUMAN                         | Lysosomal protective protein               | lysosome                                | n-linked                        |    | 1  |    | 1  |     | 1  | 1   |    |    | 1  |  |
| PRSS8_HUMAN                        | Prostasin                                  | secreted protein                        | n-linked                        |    |    |    |    |     |    |     |    |    | 1  |  |
| PTGDS_HUMAN                        | Prostaglandin-H2 D-isomerase               | secreted protein                        | n-linked                        | 1  | 1  |    | 1  | 1   | 1  | 1   | 1  | 1  | 1  |  |
| QPCT_HUMAN                         | Glutaminy-peptide cyclotransferase         | unknown                                 | n-linked                        |    |    |    | 1  |     |    | 1   |    | 1  | 1  |  |

| RS15_HUMAN             | 40S ribosomal protein S15                        | cytoplasm                   | no sites            |           |           |           |           | 1          |           |            |           |           |           |  |
|------------------------|--------------------------------------------------|-----------------------------|---------------------|-----------|-----------|-----------|-----------|------------|-----------|------------|-----------|-----------|-----------|--|
| <b>Swiss-Prot ID</b>   | <b>Protein Name</b>                              | <b>Subcellular location</b> | <b>Glycoprotein</b> | <b>T3</b> | <b>T4</b> | <b>T9</b> | <b>T8</b> | <b>T13</b> | <b>N3</b> | <b>N10</b> | <b>N2</b> | <b>N5</b> | <b>N7</b> |  |
| S100P_HUMAN            | Protein S100-P                                   | cytoplasm                   | no sites            |           |           |           |           | 1          |           | 1          |           |           |           |  |
| S10A6_HUMAN            | Protein S100-A6                                  | cytoplasm                   | no sites            |           |           |           |           | 1          |           |            |           |           |           |  |
| SAMP_HUMAN             | Serum amyloid P-component                        | secreted protein            | n-linked            |           |           | 1         |           |            |           |            |           |           |           |  |
| SAP_HUMAN              | Proactivator polypeptide                         | lysosome                    | n-linked            |           |           |           | 1         |            |           | 1          |           | 1         | 1         |  |
| SAP3_HUMAN             | Ganglioside GM2 activator                        | lysosome                    | n-linked            |           |           |           | 1         |            |           |            |           |           |           |  |
| SCG1_HUMAN             | Secretogranin-1                                  | secretory granules          | predicted           |           |           |           |           |            |           |            |           | 1         | 1         |  |
| SDC1_HUMAN             | Syndecan-1                                       | membrane                    | o-, n-linked        | 1         |           |           | 1         |            |           |            |           |           |           |  |
| SDC4_HUMAN             | Syndecan-4                                       | membrane                    | o-linked            | 1         | 1         |           | 1         |            | 1         | 1          |           | 1         |           |  |
| SH3L3_HUMAN            | SH3 domain-binding protein 1                     | cytoplasm                   | no sites            |           |           |           | 1         | 1          |           | 1          |           |           | 1         |  |
| SHPS1_HUMAN            | Signal-regulatory protein alpha-1                | membrane                    | n-linked            | 1         | 1         |           | 1         |            | 1         | 1          |           | 1         |           |  |
| SIRB1_HUMAN            | Signal-regulatory protein beta-1                 | membrane                    | n-linked            |           | 1         |           |           |            | 1         |            |           |           |           |  |
| SODE_HUMAN             | Extracellular superoxide dismutase [Cu-Zn]       | secreted protein            | n-linked            |           | 1         |           |           |            |           |            |           |           |           |  |
| SULF2_HUMAN            | Extracellular sulfatase Sulf-2                   | extracellular               | n-linked            |           |           |           |           |            |           |            |           | 1         |           |  |
| THIO_HUMAN             | Thioredoxin                                      | cytoplasm                   | no sites            |           |           |           |           | 1          |           |            |           |           |           |  |
| TETN_HUMAN             | Tetranectin                                      | secreted protein            | o-linked            |           |           |           |           |            |           |            |           |           | 1         |  |
| TPP1_HUMAN             | Tripeptidyl-peptidase 1                          | lysosome                    | predicted           |           |           |           | 1         |            |           | 1          |           |           | 1         |  |
| TRFE_HUMAN             | Serotransferrin                                  | secreted protein            | o-, n-linked        | 1         | 1         | 1         |           | 1          |           | 1          | 1         |           |           |  |
| TRFL_HUMAN             | Lactotransferrin                                 | secreted protein            | n-linked            |           |           |           |           |            |           |            |           | 1         |           |  |
| TTLL7_HUMAN            | Tubulin--tyrosine ligase-like protein 7          | unknown                     | potential           |           |           | 1         |           |            |           |            |           | 1         |           |  |
| VMO1_HUMAN             | Vitelline membrane outer layer protein 1 homolog | secreted protein            | no sites            |           |           |           | 1         |            |           |            |           | 1         | 1         |  |
| UBIQ_HUMAN             | Ubiquitin                                        | cytoplasm                   | no sites            |           |           |           |           | 1          |           |            |           |           |           |  |
| UD12_HUMAN             | UDP-glucuronosyltransferase 1-2                  | microsome                   | n-linked            |           |           |           | 1         | 1          |           |            |           |           |           |  |
| UFO_HUMAN              | Tyrosine-protein kinase receptor UFO             | membrane                    | n-linked            | 1         | 1         |           |           |            | 1         | 1          |           | 1         |           |  |
| UROM_HUMAN             | Uromodulin                                       | secreted protein            | n-linked            | 1         | 1         |           | 1         |            | 1         | 1          |           | 1         | 1         |  |
| UTER_HUMAN             | Uteroglobin                                      | secreted protein            | no sites            |           |           |           |           | 1          |           |            |           |           |           |  |
| VEZA_HUMAN             | Vezatin                                          | membrane                    | potential           | 1         |           | 1         |           |            |           |            |           |           |           |  |
| VTNC_HUMAN             | Vitronectin                                      | secreted protein            | n-linked            | 1         |           | 1         |           |            |           |            |           |           |           |  |
| WTAP_HUMAN             | WT1-associated protein                           | nucleus                     | potential           |           |           |           |           |            |           | 1          |           | 1         |           |  |
| ZA2G_HUMAN             | Zinc-alpha-2-glycoprotein                        | secreted protein            | n-linked            | 1         | 1         |           | 1         | 1          | 1         | 1          | 1         | 1         | 1         |  |
| <b>Total ID/sample</b> |                                                  |                             |                     | <b>56</b> | <b>68</b> | <b>58</b> | <b>69</b> | <b>49</b>  | <b>49</b> | <b>60</b>  | <b>49</b> | <b>41</b> | <b>61</b> |  |
